# Supplementary material for: What is the key mediator of the neurovascular coupling response?
Source: PubMed Central journal article supplement (PMC6331662; doi:10.1016/j.neubiorev.2018.11.011), 2019-01
Supplement: mmc1.pdf [file mmc1.pdf]

| Target             | % Remaining NVR | Reference                         | Target             | % Remaining NVR | Reference                       |
|--------------------|-----------------|-----------------------------------|--------------------|-----------------|---------------------------------|
| <b>nNOS</b>        | 32.3            | Bonvento, G., N. et al., 2000     | <b>ACh</b>         | 41.0            | Arneric, S.P., et al., 1987     |
| (Mean 35.8%)       | 21.8            | Burke, M. and C. Bührle., 2006    | (Mean 46.4%)       | 60.0            | Biesold, D., et al., 1989       |
|                    | 79.0            | Cholet, N., et al., 1997          |                    | 15.0            | Kocharyan, A., et al., 2008     |
|                    | 45.0            | Iadecola, C., G., et al., 1993    |                    | 60.0            | Kocharyan, A., et al., 2008     |
|                    | 50.0            | Kitaura, H., et al., 2007         |                    | 56.0            | Zhang, F., et al., 1995         |
|                    | 38.9            | Lindauer, U., et al., 1999        | <b>Adenosine</b>   | 59.2            | Dirnagl, U., et al., 1994       |
|                    | 40.0            | Offenhauser, N., K., et al., 2005 | (Mean 46.6%)       | 66.8            | Ko, K. R., et al., 1990         |
|                    | -1.1            | Stefanovic, B., et al., 2007      |                    | 47.3            | Ko, K. R., et al., 1990         |
|                    | 51.0            | Yang, G. and Iadecola, C., 1997   |                    | 29.7            | Meno, J.R., et al., 2005        |
|                    | 10.0            | Yang, G., et al., 1999            |                    | 30.0            | Meno, J.R., et al., 2005        |
|                    | 27.0            | Yang, G., et al., 2003            | <b>COX-2</b>       | 50.0            | Bakalova, R., T. et al., 2002   |
| <b>Multiple</b>    | 41.9            | Dirnagl, U., et al., 1994         | (Mean 53.3%)       | 47.3            | Lecrux, C., et al., 2011        |
| (Mean 39.0%)       | 30.0            | Golanov, E.V., Reis, D.J., 1994   |                    | 53.0            | Niwa, K., et al., 2000          |
|                    | 33.3            | Leithner, C., et al., 2010        |                    | 63.0            | Niwa, K., et al., 2000          |
|                    | 31.8            | Peng, X., C., et al., 2004        | <b>AMPA/NMDA</b>   | 66.7            | Calcinaghi, N., et al., 2011    |
|                    | 64.0            | Petzold, G.C., et al., 2008       | (Mean 55.8%)       | 62.2            | Lecrux, C., et al., 2011        |
|                    | 33.3            | Tarantini, S., et al., 2015       |                    | 65.5            | Petzold, G. C., et al., 2008    |
| <b>NOS</b>         | 40.0            | Adachi, T., et al., 1992          |                    | 29.0            | Yang, G., et al., 1999          |
| (Mean 41.8%)       | 40.0            | Akgoren, N., et al., 1997         | <b>COX</b>         | 45.0            | Bakalova, R. T., et al. 2002    |
|                    | 62.6            | Dirnagl, U., et al., 1993         | (Mean 56.3%)       | 47.2            | Bruhn, H., et al., 2001         |
|                    | 39.0            | Golanov, E.V., Reis, D.J., 1994   |                    | 62.0            | Golanov, E.V., Reis, D.J., 1994 |
|                    | 20.0            | Iadecola, C., G., et al., 1993    |                    | 50.0            | St Lawrence, K.S., et al. 2003  |
|                    | 0.0             | Ido, Y., et al., 2004             |                    | 77.4            | St Lawrence, K.S., et al. 2003  |
|                    | 53.3            | Irikura, K., et al., 1994         | <b>K+ Channels</b> | 108.3           | Hosford, P.S., et al., 2018     |
|                    | 50.0            | Kitaura, H., et al., 2007         | (Mean 59.8%)       | 60.0            | Longden, T.A., et al., 2011     |
|                    | 52.3            | Ngai, A.C., et al., 1995          |                    | 19.9            | Longden, T.A., et al., 2017     |
|                    | 36.4            | Peng, X., C., et al., 2004        |                    | 51.0            | Longden, T.A., et al., 2017     |
|                    | 29.1            | Raszkievicz, et al., 1992         | <b>mGluR</b>       | 122.9           | Calcinaghi, N., et al., 2011    |
|                    | 52.9            | Toth, P., et al., 2015            | (Mean 63.0%)       | 59.5            | Lecrux, C., et al., 2011        |
|                    | 53.0            | Yang, G. and C. Iadecola., 1997   |                    | 46.0            | Petzold, G. C., et al., 2008    |
|                    | 57.0            | Zhang, F., et al., 1995           |                    | 51.7            | Sloan, H.L., et al., 2010       |
| <b>ATP</b>         | 32.4            | Mishra, A., et al., 2016          |                    | 34.8            | Zonta, M., et al., 2003         |
| (Mean 43.0%)       | 48.4            | Toth, P., et al., 2015            | <b>GABA</b>        | 54.0            | Kocharyan, A., P., et al., 2008 |
|                    | 48.1            | Wells, J.A., et al., 2015         | (Mean 75.6%)       | 72.0            | Kocharyan, A., P., et al., 2008 |
| <b>Epoxygenase</b> | 60.0            | Lecrux, C., et al., 2011          |                    | 90.0            | Kocharyan, A., P., et al., 2008 |
| (Mean 45.5%)       | 30.6            | Peng, X, et al., 2002             |                    | 69.6            | Lecrux, C., et al., 2011        |
|                    | 32.3            | Peng, X, et al., 2002             |                    | 92.6            | Lecrux, C., et al., 2011        |
|                    | 68.2            | Peng, X., C., et al., 2004        | <b>COX-1</b>       | 103.4           | Niwa, K., et al., 2001          |
|                    | 36.4            | Peng, X., C., et al., 2004        | (Mean 85.5%)       | 88.9            | Niwa, K., et al., 2001          |
|                    |                 |                                   |                    | 64.0            | Petzold, G. C., et al., 2008    |

**Supplementary Table 1** | Individual data points showing the effect of target pharmacological blockade/genetic deletion in vivo expressed in percent of neurovascular response (NVR) remaining (as plotted in Figure 2) with corresponding references to the original sources.
